# Supplementary material for: Loss of MAT2A compromises methionine metabolism and represents a vulnerability in H3K27M mutant glioma by modulating the epigenome
Source: Springer Nature journal article supplement (doi:10.1038/s43018-022-00348-3), 2022-04-14

DIPG4\_NS\_No Dox

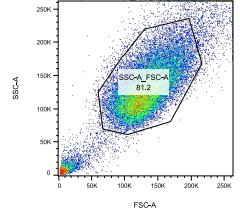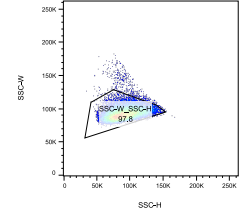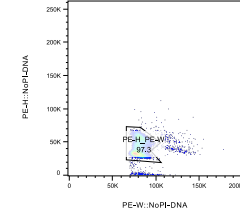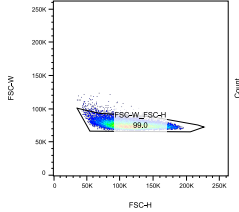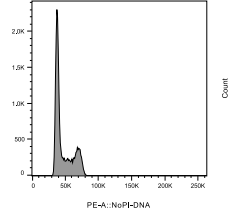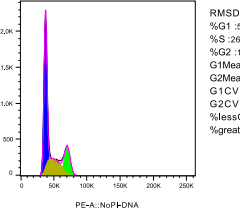

RMSD:4.69  
%G1 :55.0  
%S :26.5  
%G2 :19.0  
G1Mean :38091  
G2Mean :70609  
G1CV:3.20  
G2CV:8.75  
%lessG1 :-1.60  
%greaterG2 :-0.67

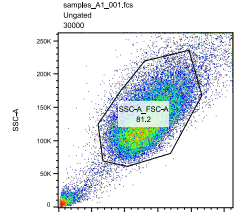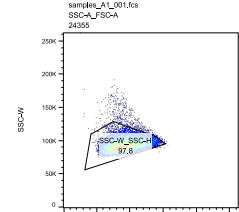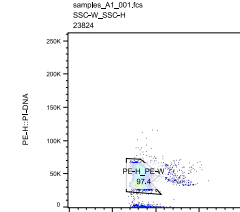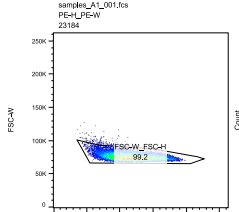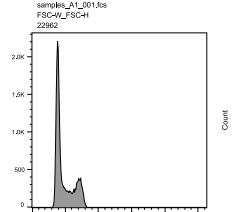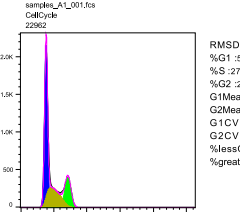

RMSD:4.60  
%G1 :53.0  
%S :27.4  
%G2 :20.2  
G1Mean :38914  
G2Mean :71716  
G1CV:8.13  
G2CV:9.94  
%lessG1 :-1.81  
%greaterG2 :-0.58

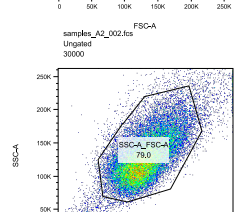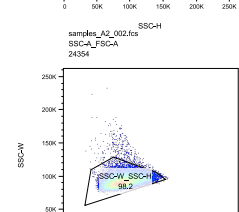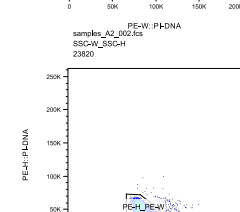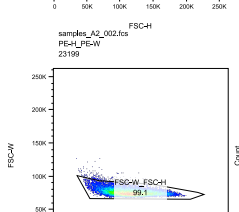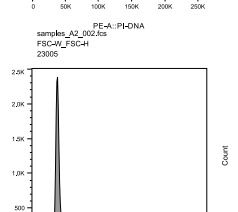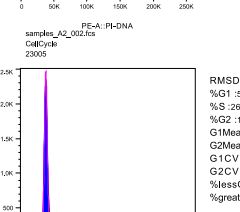

RMSD:4.69  
%G1 :56.6  
%S :26.7  
%G2 :17.3  
G1Mean :38400  
G2Mean :71017  
G1CV:7.86  
G2CV:8.75  
%lessG1 :-1.73  
%greaterG2 :-0.54

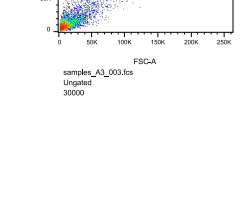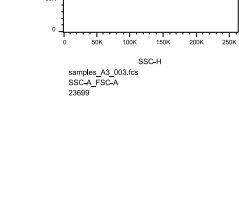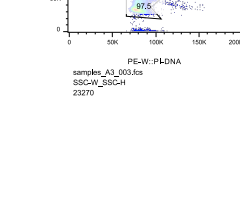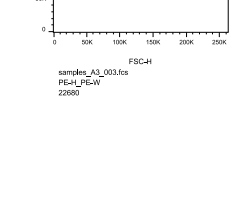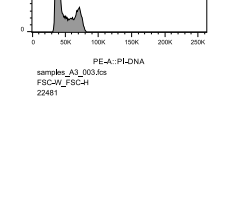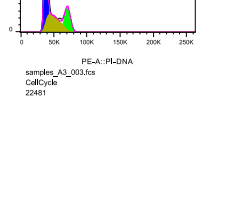

RMSD:4.69  
%G1 :56.6  
%S :26.7  
%G2 :17.3  
G1Mean :38400  
G2Mean :71017  
G1CV:7.86  
G2CV:8.75  
%lessG1 :-1.73  
%greaterG2 :-0.54

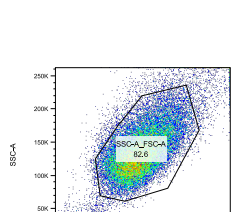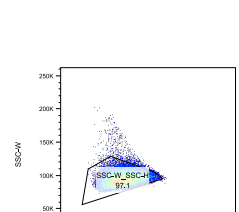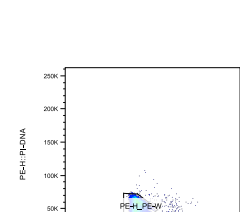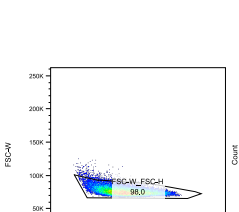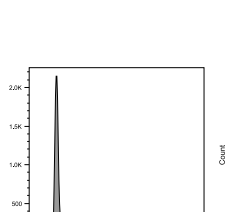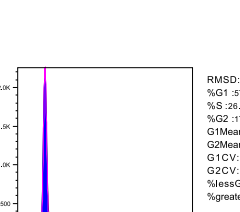

RMSD:3.94  
%G1 :57.3  
%S :26.2  
%G2 :17.0  
G1Mean :41337  
G2Mean :77110  
G1CV:8.04  
G2CV:8.60  
%lessG1 :-1.16  
%greaterG2 :-0.85

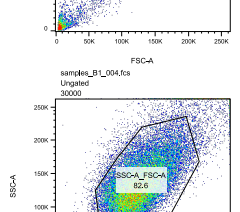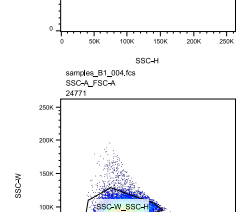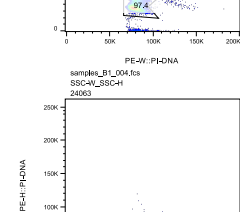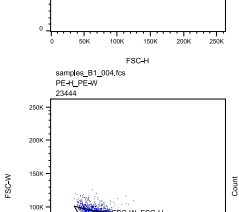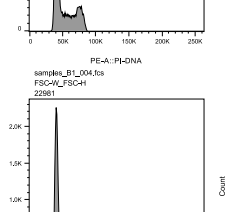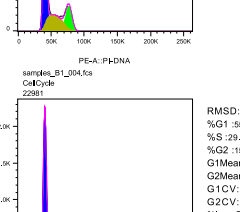

RMSD:4.48  
%G1 :55.9  
%S :29.1  
%G2 :15.5  
G1Mean :41160  
G2Mean :77380  
G1CV:7.91  
G2CV:8.06  
%lessG1 :-1.50  
%greaterG2 :-0.94

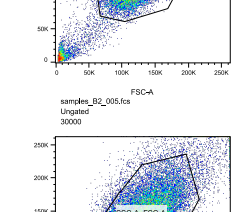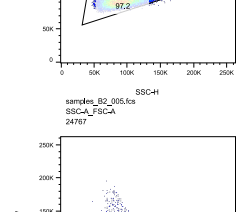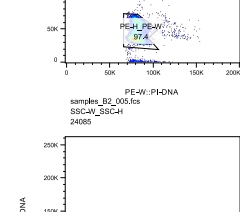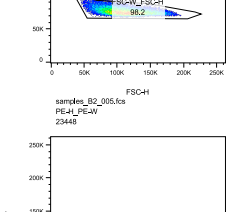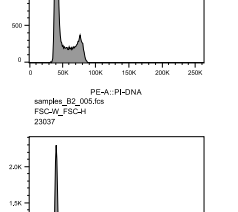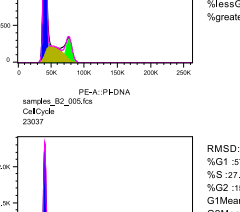

RMSD:4.41  
%G1 :57.1  
%S :27.5  
%G2 :15.9  
G1Mean :41022  
G2Mean :77111  
G1CV:7.82  
G2CV:8.13  
%lessG1 :-1.38  
%greaterG2 :-0.83

DIPG4\_NS\_No Dox

DIPG4\_NS\_No Dox

DIPG4\_NS\_Dox

DIPG4\_NS\_Dox

DIPG4\_NS\_Dox

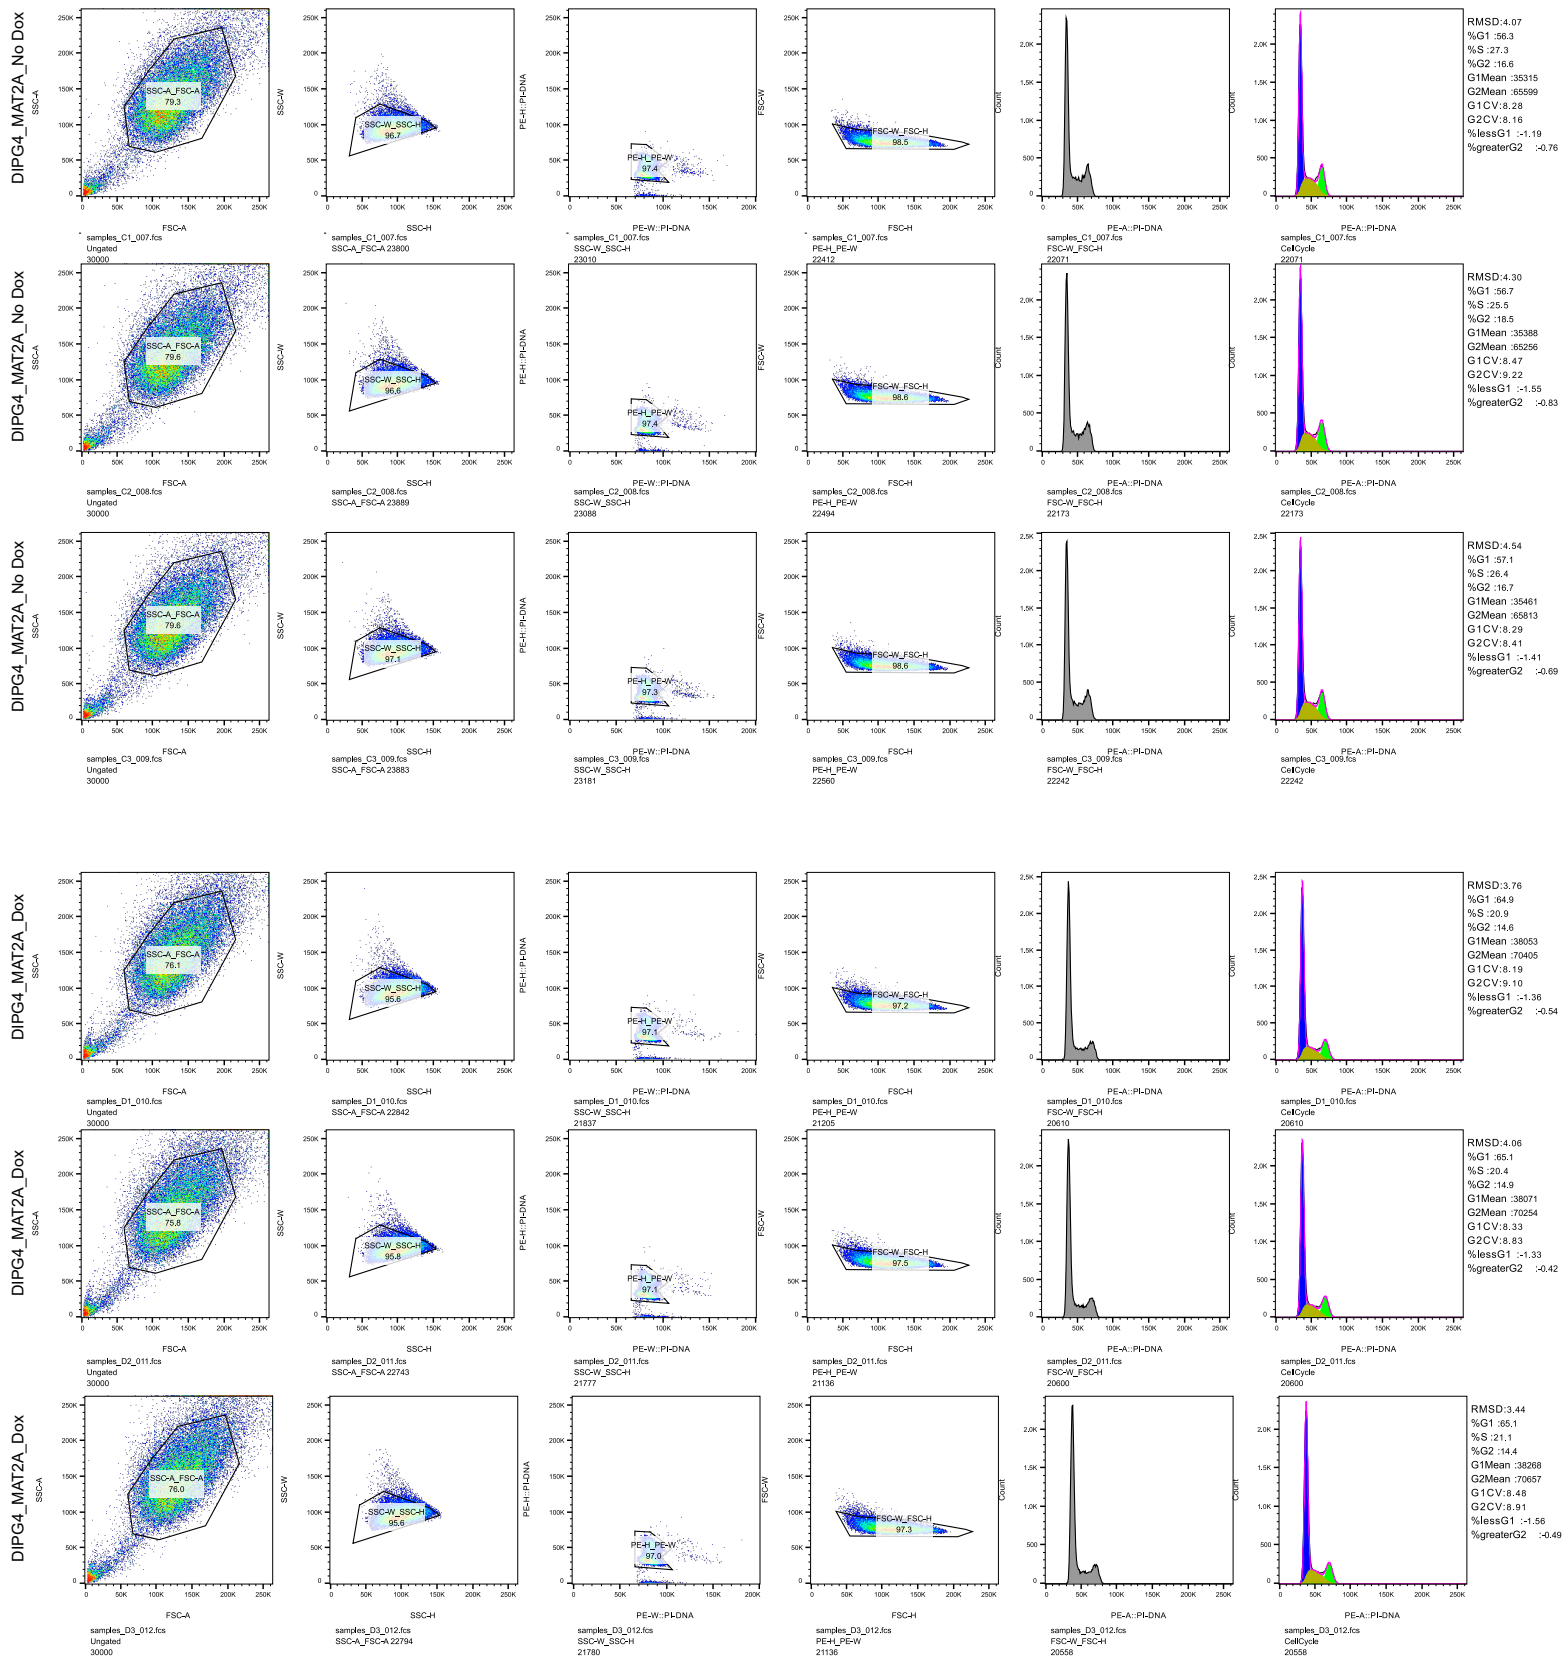

BT-245 Ns\_No\_Dox

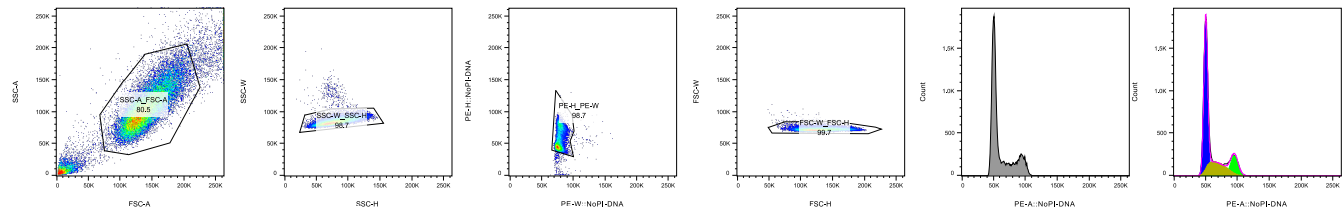

RMSD:3.58  
 %G1 :98.3  
 %S :24.9  
 %G2 :1.7  
 G1Mean :50688  
 G2Mean :95517  
 G1CV:8.35  
 G2CV:8.69  
 %lessG1 :-1.56  
 %greaterG2 :-0.68

BT-245 Ns\_No\_Dox

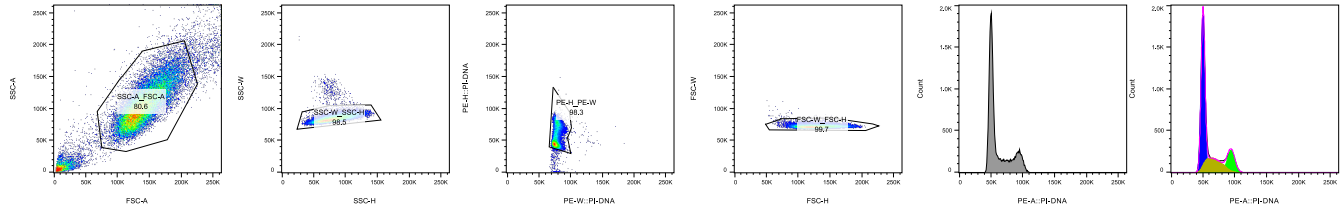

RMSD:3.43  
 %G1 :98.3  
 %S :23.9  
 %G2 :1.6  
 G1Mean :50569  
 G2Mean :94510  
 G1CV:8.24  
 G2CV:8.80  
 %lessG1 :-1.39  
 %greaterG2 :-0.33

BT-245 Ns\_No\_Dox

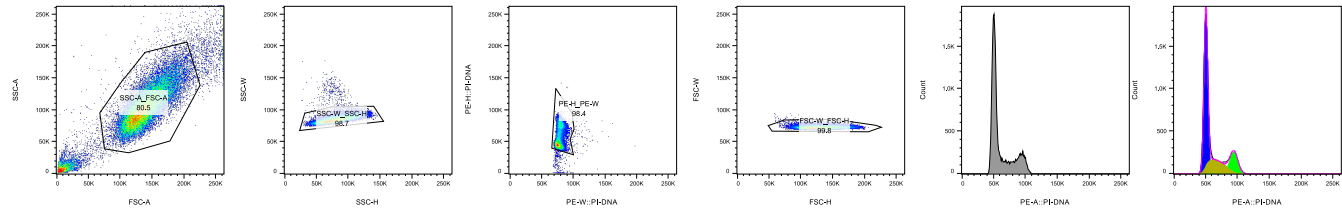

RMSD:4.04  
 %G1 :98.5  
 %S :22.8  
 %G2 :1.1  
 G1Mean :50896  
 G2Mean :94720  
 G1CV:8.32  
 G2CV:8.36  
 %lessG1 :-1.48  
 %greaterG2 :-0.42

BT-245 Ns\_No\_Dox

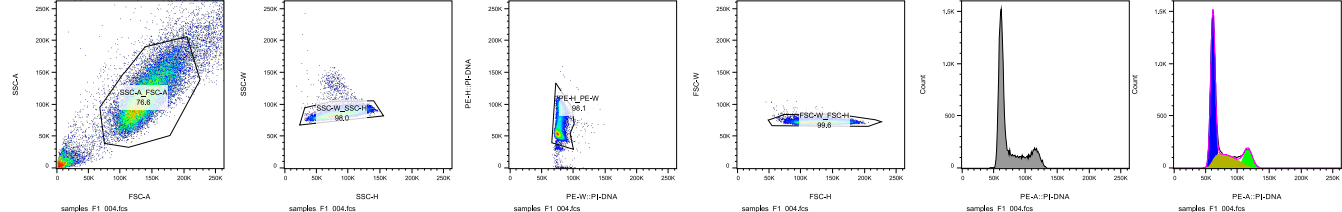

RMSD:3.65  
 %G1 :98.1  
 %S :26.6  
 %G2 :14.3  
 G1Mean :51884  
 G2Mean :116739  
 G1CV:7.85  
 G2CV:8.37  
 %lessG1 :-1.22  
 %greaterG2 :-0.59

BT-245 Ns\_No\_Dox

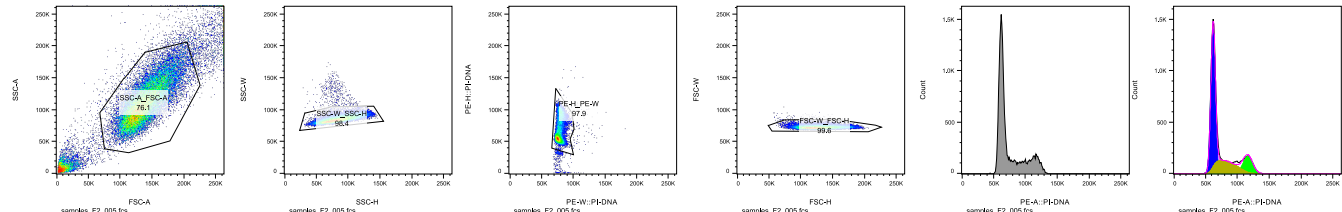

RMSD:3.42  
 %G1 :98.6  
 %S :25.2  
 %G2 :15.5  
 G1Mean :52275  
 G2Mean :116532  
 G1CV:7.90  
 G2CV:8.19  
 %lessG1 :-1.52  
 %greaterG2 :-0.54

BT-245 Ns\_No\_Dox

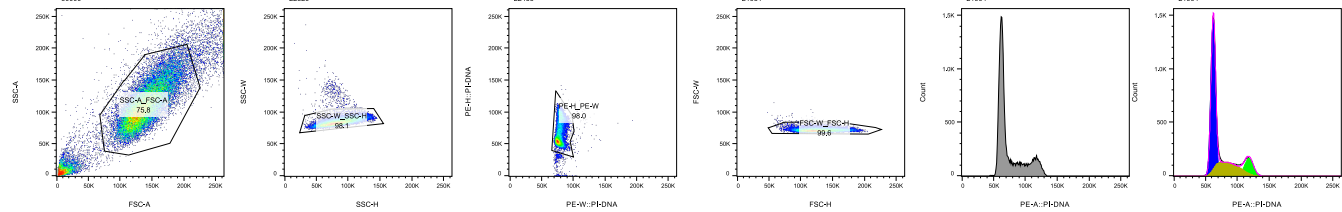

RMSD:3.13  
 %G1 :98.5  
 %S :26.7  
 %G2 :12.9  
 G1Mean :52422  
 G2Mean :115194  
 G1CV:8.00  
 G2CV:8.08  
 %lessG1 :-1.19  
 %greaterG2 :-0.72

BT-245 MAT2A  
No\_Dox

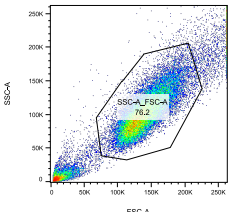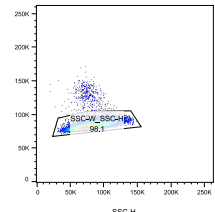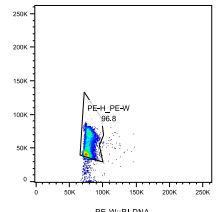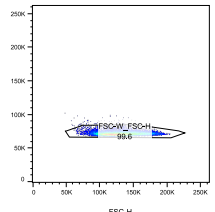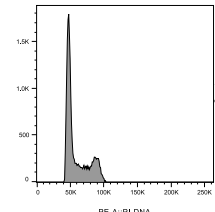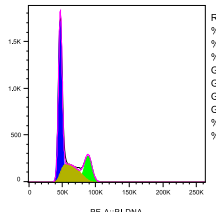

RMSD: 4.69  
%G1 :55.4  
%S :27.4  
%G2 :18.0  
G1Mean :47669  
G2Mean :89018  
G1 CV :7.94  
G2 CV :8.75  
%lessG1 :>-2.15  
%greaterG2 :>-0.43

samples\_G1\_007.fcs  
Ungated  
30000

samples\_G1\_007.fcs  
SSC-A\_FSC-A  
22873

samples\_G1\_007.fcs  
SSC-W\_SSC-H  
22429

samples\_G1\_007.fcs  
PE-H\_PE-W  
21718

samples\_G1\_007.fcs  
FSC-W\_FSC-H  
21628

samples\_G1\_007.fcs  
CellCycle  
21628

BT-245 MAT2A  
No\_Dox

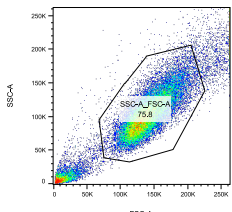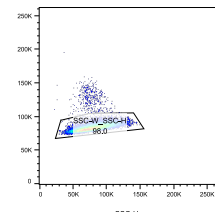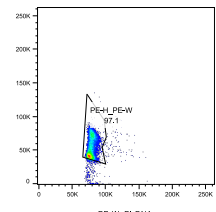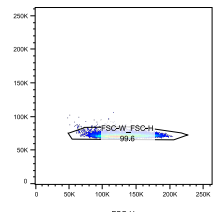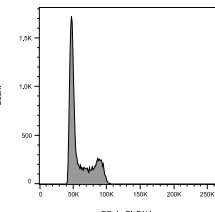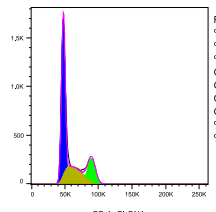

RMSD: 4.79  
%G1 :55.9  
%S :26.6  
%G2 :18.4  
G1Mean :48128  
G2Mean :89817  
G1 CV :8.16  
G2 CV :9.05  
%lessG1 :>-2.10  
%greaterG2 :>-0.50

samples\_G2\_008.fcs  
Ungated  
30000

samples\_G2\_008.fcs  
SSC-A\_FSC-A  
22740

samples\_G2\_008.fcs  
SSC-W\_SSC-H  
22291

samples\_G2\_008.fcs  
PE-H\_PE-W  
21651

samples\_G2\_008.fcs  
FSC-W\_FSC-H  
21564

samples\_G2\_008.fcs  
CellCycle  
21564

BT-245 MAT2A  
No\_Dox

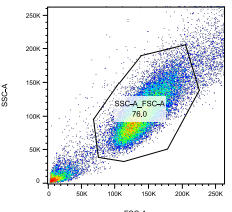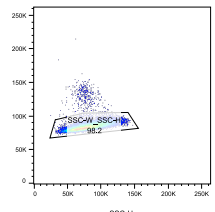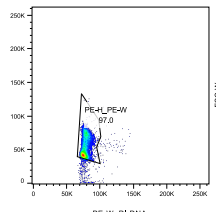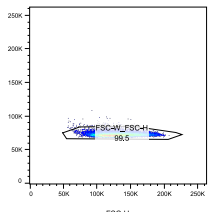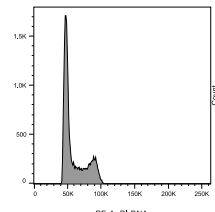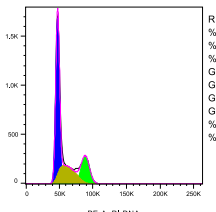

RMSD: 5.80  
%G1 :56.0  
%S :25.2  
%G2 :19.9  
G1Mean :47887  
G2Mean :88956  
G1 CV :8.13  
G2 CV :9.55  
%lessG1 :>-2.23  
%greaterG2 :>-0.28

samples\_G3\_009.fcs  
Ungated  
30000

samples\_G3\_009.fcs  
SSC-A\_FSC-A  
22895

samples\_G3\_009.fcs  
SSC-W\_SSC-H  
22396

samples\_G3\_009.fcs  
PE-H\_PE-W  
21710

samples\_G3\_009.fcs  
FSC-W\_FSC-H  
21619

samples\_G3\_009.fcs  
CellCycle  
21619

BT-245 MAT2A  
Dox

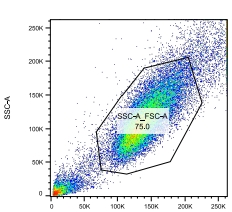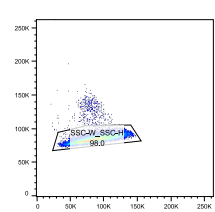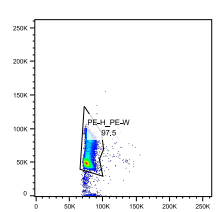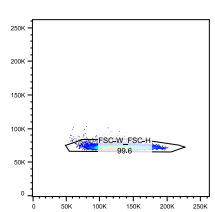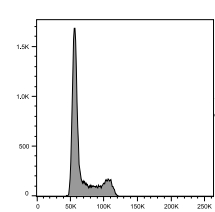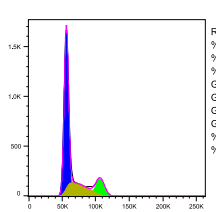

RMSD: 3.23  
%G1 :63.6  
%S :23.2  
%G2 :13.5  
G1Mean :56676  
G2Mean :106896  
G1 CV :8.02  
G2 CV :8.60  
%lessG1 :>-1.41  
%greaterG2 :>-0.47

samples\_H1\_010.fcs  
Ungated  
30000

samples\_H1\_010.fcs  
SSC-A\_FSC-A  
22492

samples\_H1\_010.fcs  
SSC-W\_SSC-H  
22445

samples\_H1\_010.fcs  
PE-H\_PE-W  
21492

samples\_H1\_010.fcs  
FSC-W\_FSC-H  
21408

samples\_H1\_010.fcs  
CellCycle  
21408

BT-245 MAT2A  
Dox

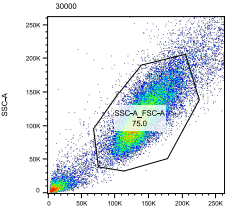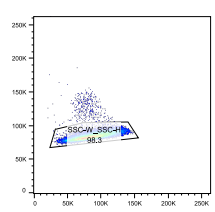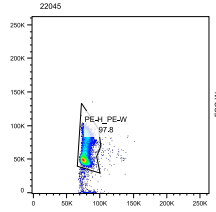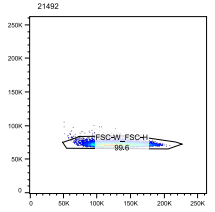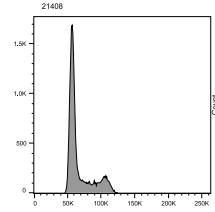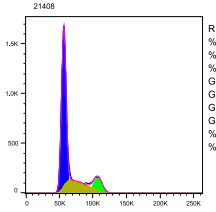

RMSD: 2.93  
%G1 :64.5  
%S :23.9  
%G2 :11.7  
G1Mean :57047  
G2Mean :107479  
G1 CV :8.24  
G2 CV :8.34  
%lessG1 :>-1.40  
%greaterG2 :>-0.53

samples\_H2\_011.fcs  
Ungated  
30000

samples\_H2\_011.fcs  
SSC-A\_FSC-A  
22498

samples\_H2\_011.fcs  
SSC-W\_SSC-H  
22109

samples\_H2\_011.fcs  
PE-H\_PE-W  
21823

samples\_H2\_011.fcs  
FSC-W\_FSC-H  
21538

samples\_H2\_011.fcs  
CellCycle  
21538

BT-245 MAT2A  
Dox

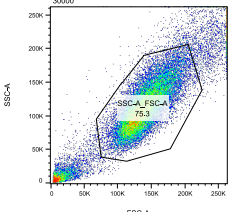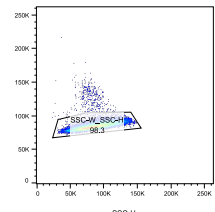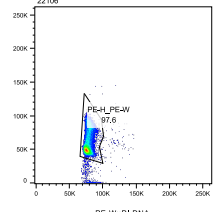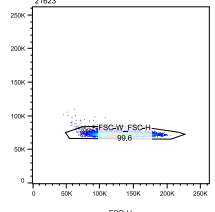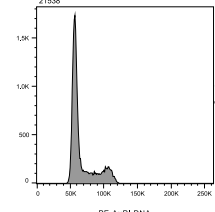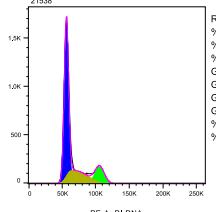

RMSD: 3.44  
%G1 :64.0  
%S :21.9  
%G2 :14.3  
G1Mean :56773  
G2Mean :105584  
G1 CV :8.07  
G2 CV :9.15  
%lessG1 :>-1.30  
%greaterG2 :>-0.27

samples\_H3\_012.fcs  
Ungated  
30000

samples\_H3\_012.fcs  
SSC-A\_FSC-A  
22804

samples\_H3\_012.fcs  
SSC-W\_SSC-H  
22210

samples\_H3\_012.fcs  
PE-H\_PE-W  
21692

samples\_H3\_012.fcs  
FSC-W\_FSC-H  
21595

samples\_H3\_012.fcs  
CellCycle  
21595

DIPG13\_Ns\_No\_Dox

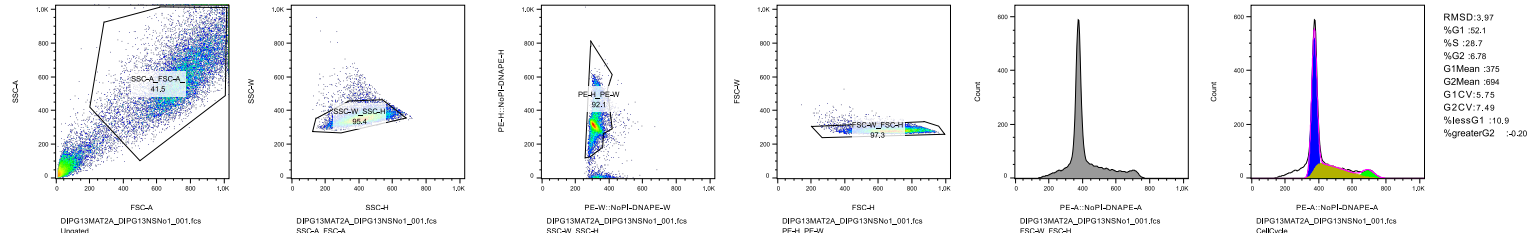

DIPG13\_Ns\_No\_Dox

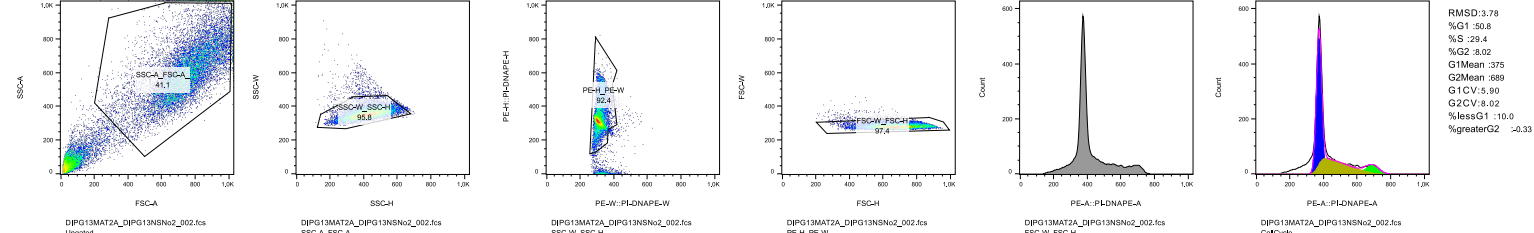

DIPG13\_Ns\_No\_Dox

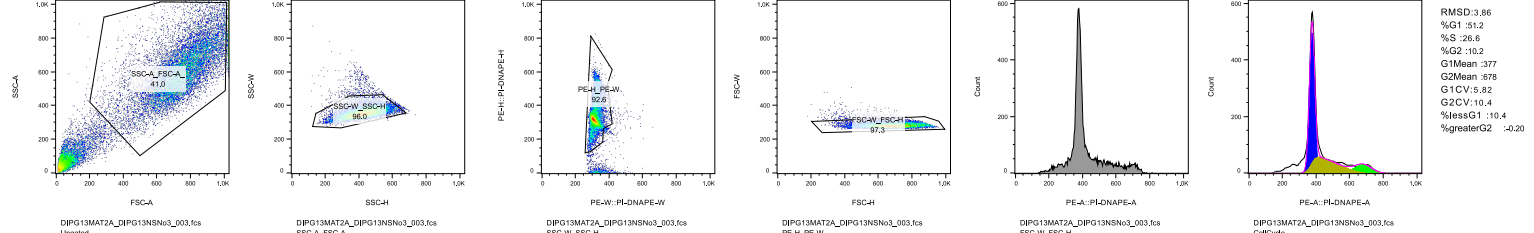

DIPG13\_Ns\_Dox

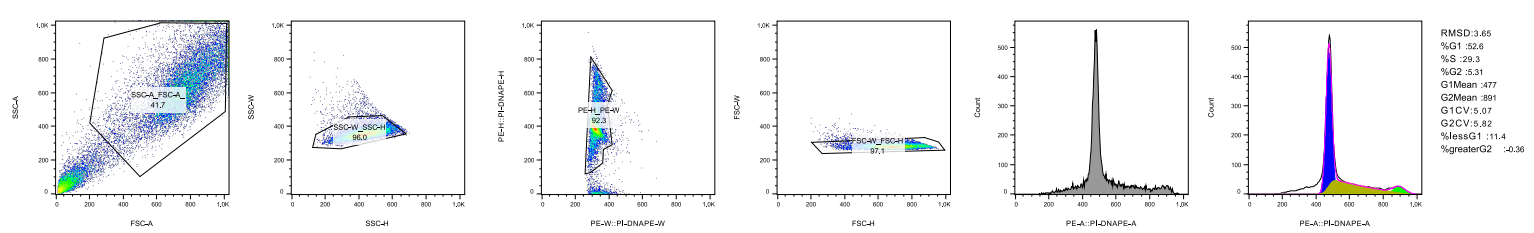

DIPG13\_Ns\_Dox

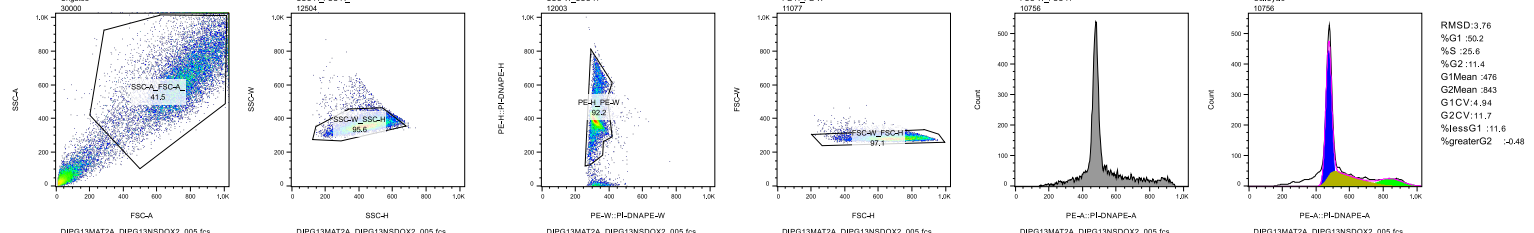

DIPG13\_Ns\_Dox

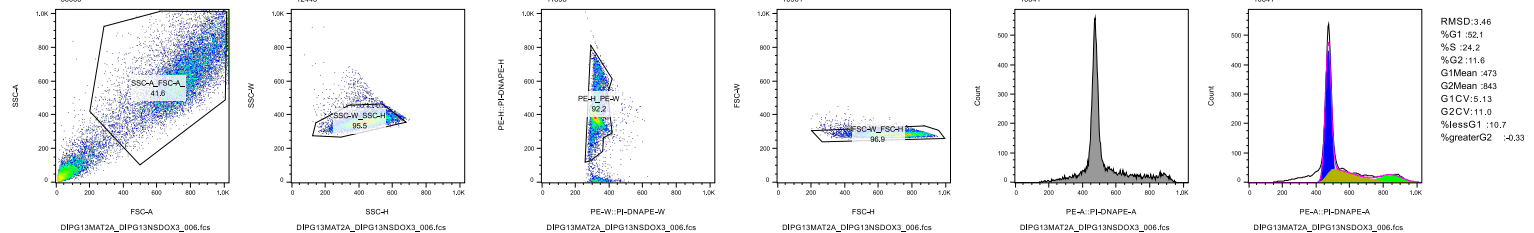

DIPG13\_MATZA No Dox

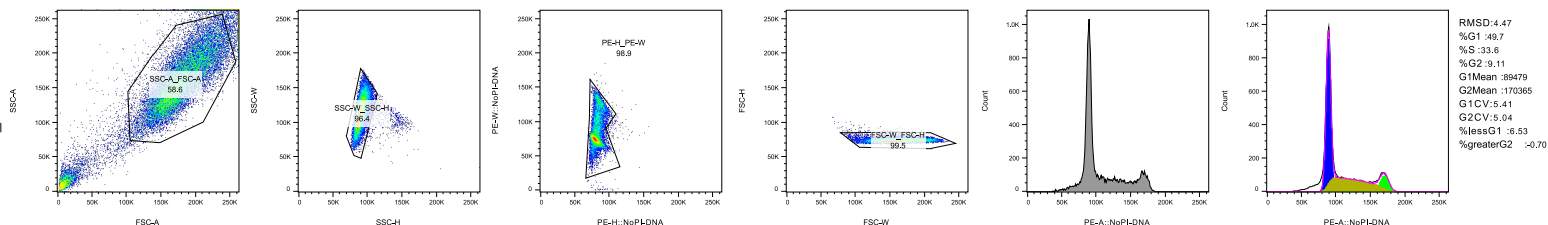

DIPG13\_MATZA No Dox

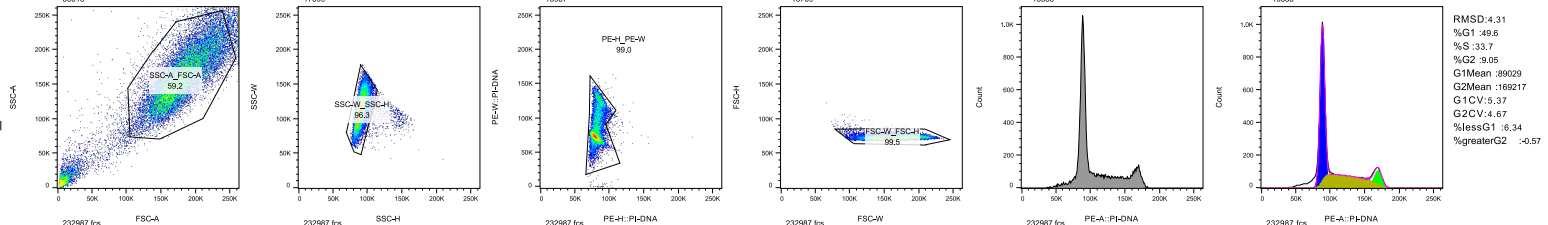

DIPG13\_MATZA No Dox

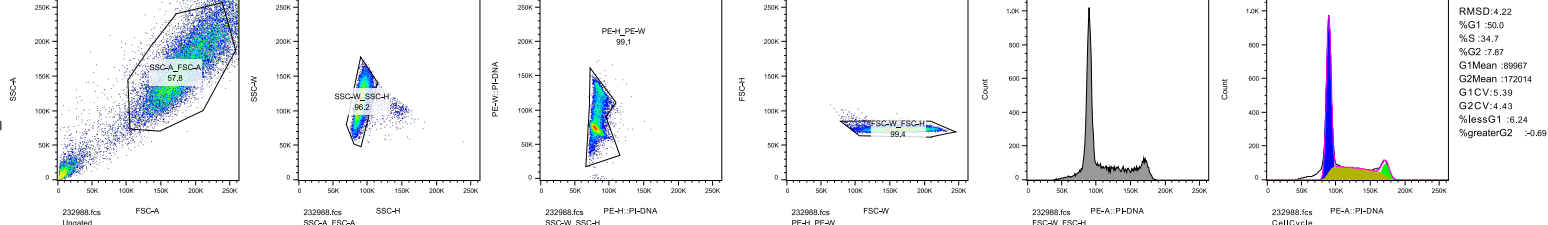

DIPG13\_MATZA Dox

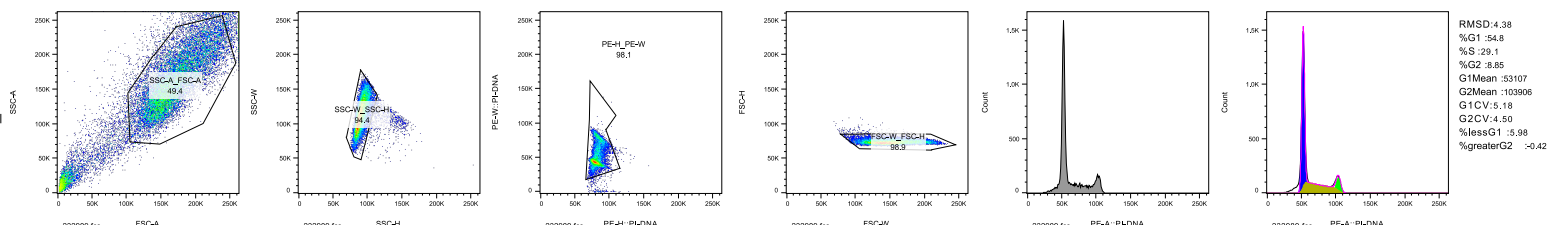

DIPG13\_MATZA Dox

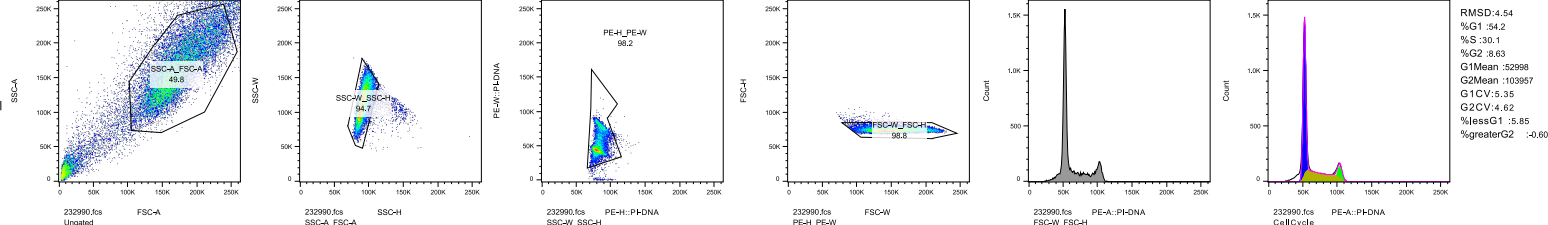

DIPG13\_MATZA Dox

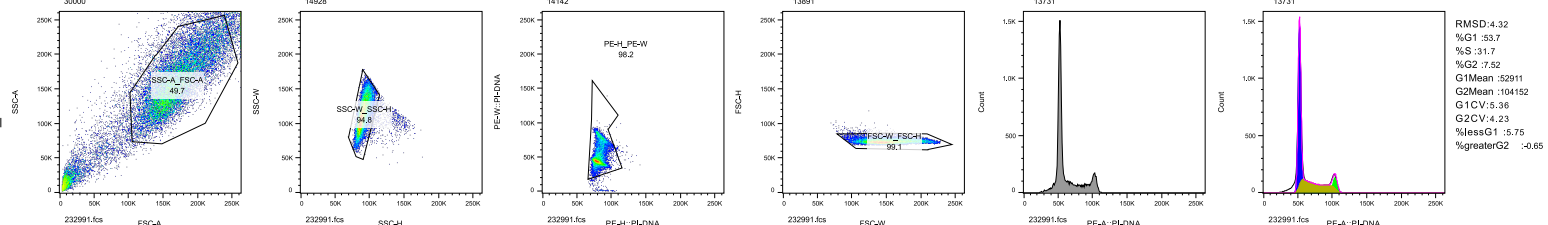

Supplement: 43018_2022_348_MOESM21_ESM.pdf [file 43018_2022_348_MOESM21_ESM.pdf]
