# Supplementary figures and images for: Loss of MAT2A compromises methionine metabolism and represents a vulnerability in H3K27M mutant glioma by modulating the epigenome
Source: Springer Nature journal article supplement (doi:10.1038/s43018-022-00348-3), 2022-04-14

Figure 5A

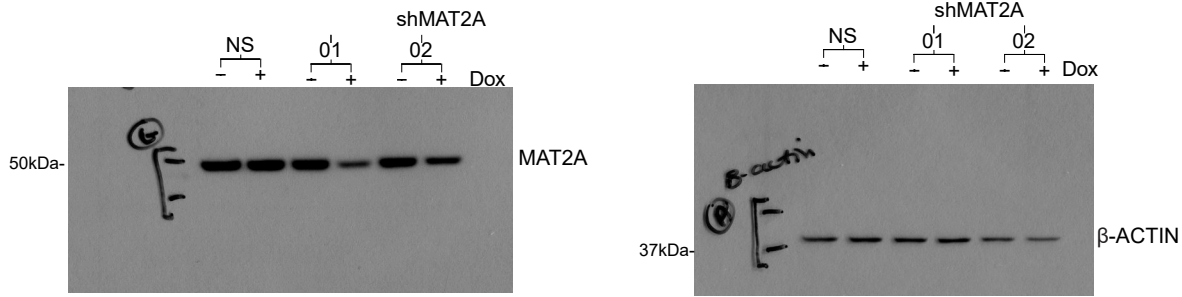

Figure 5B

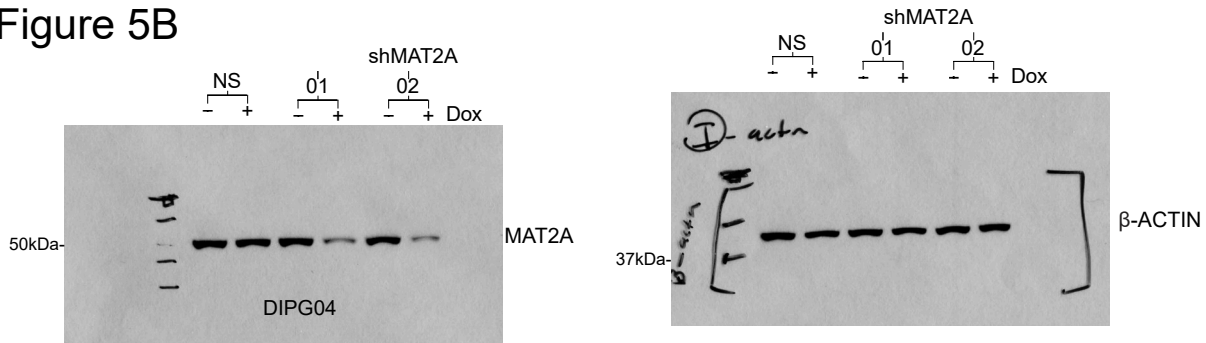

Figure 5C

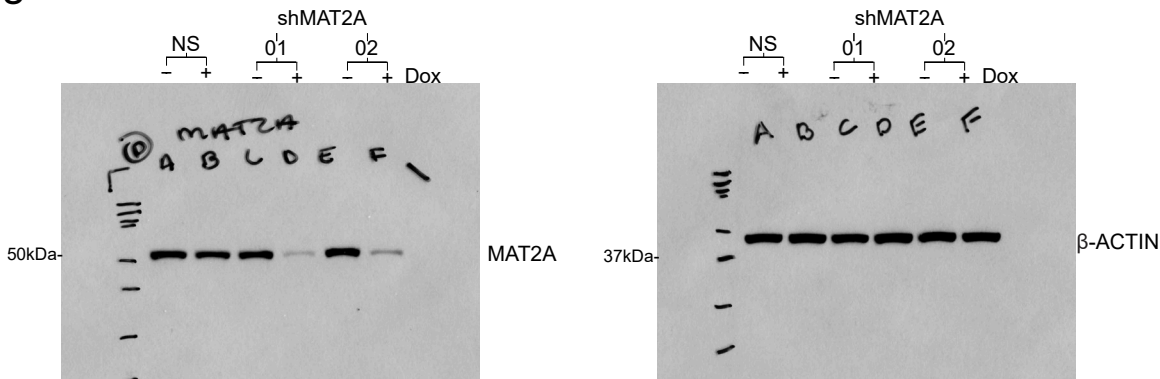

Figure 5J

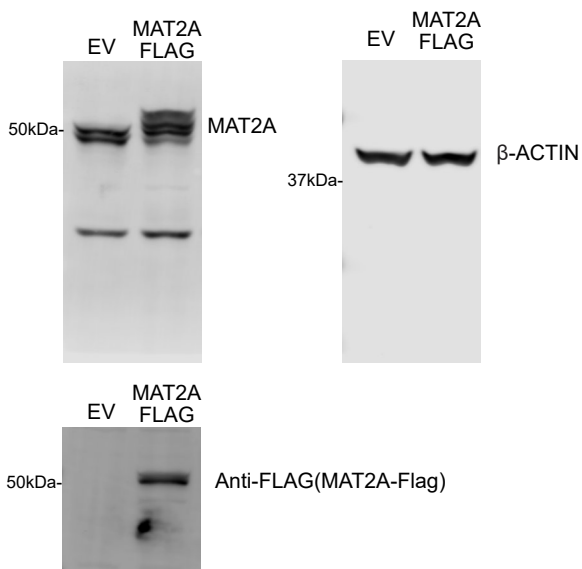

Figure 5K

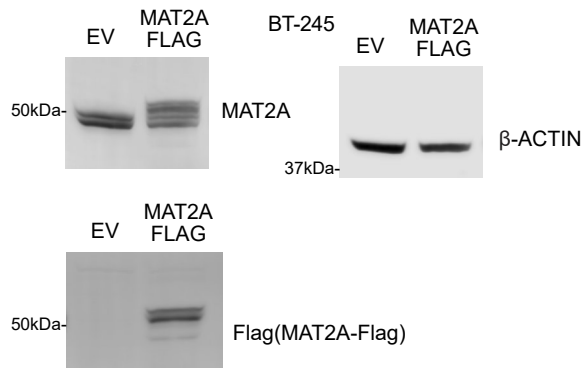

Supplement: 43018_2022_348_MOESM10_ESM.pdf [file 43018_2022_348_MOESM10_ESM.pdf]

Figure 6C

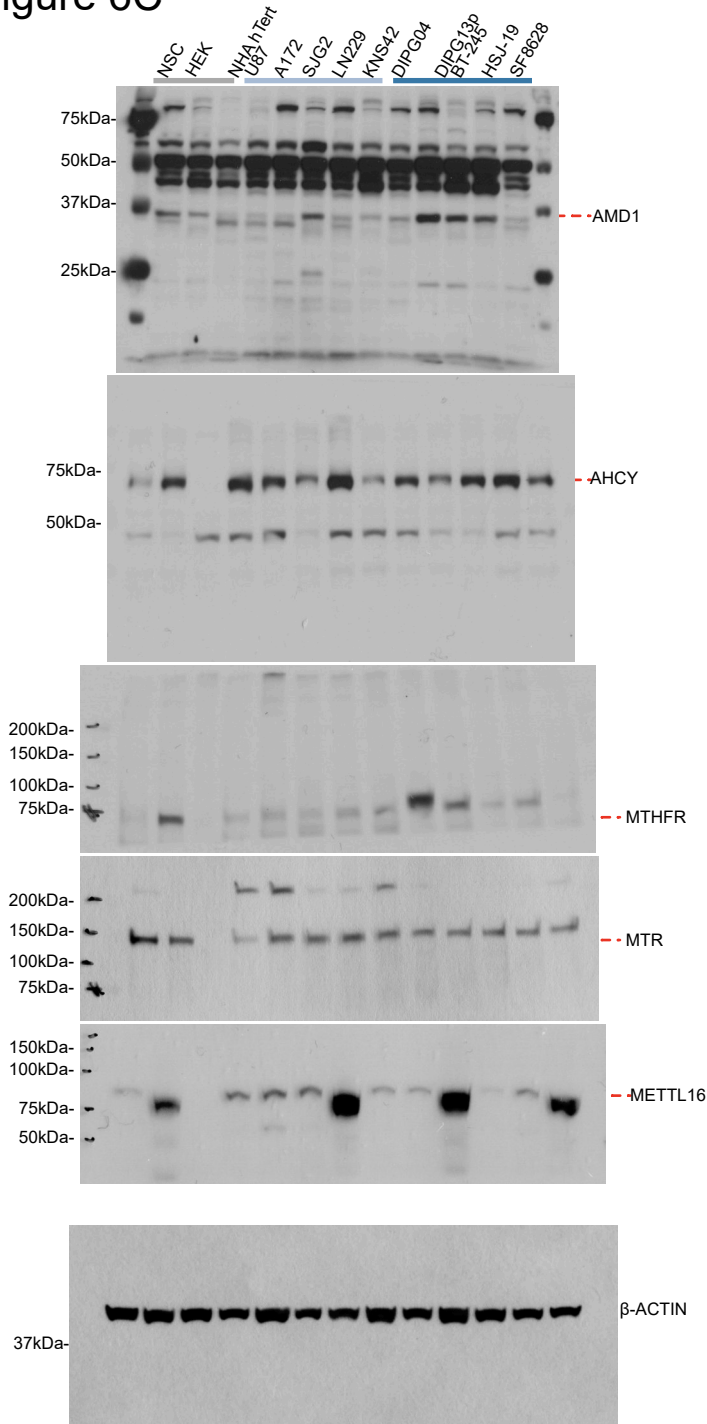

Figure 6E

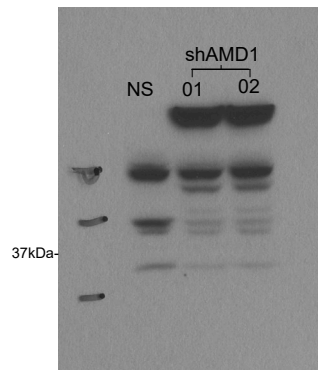

Figure 6G

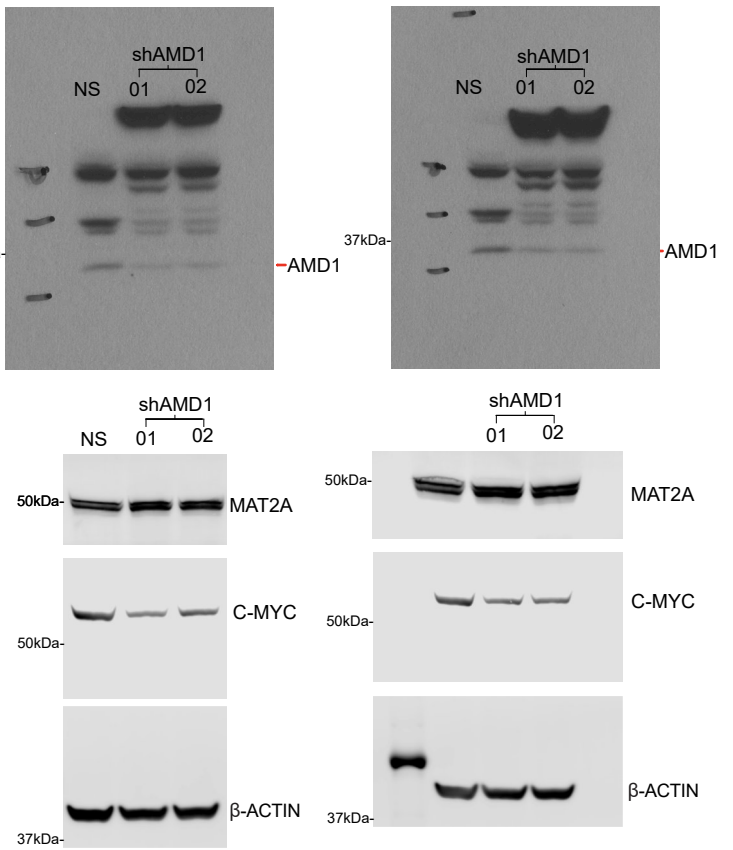

Figure 6N

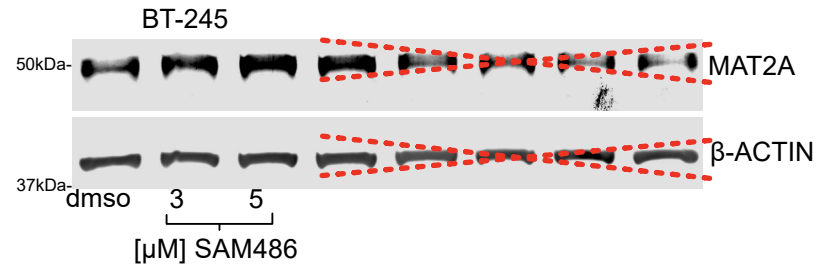

Figure 6O

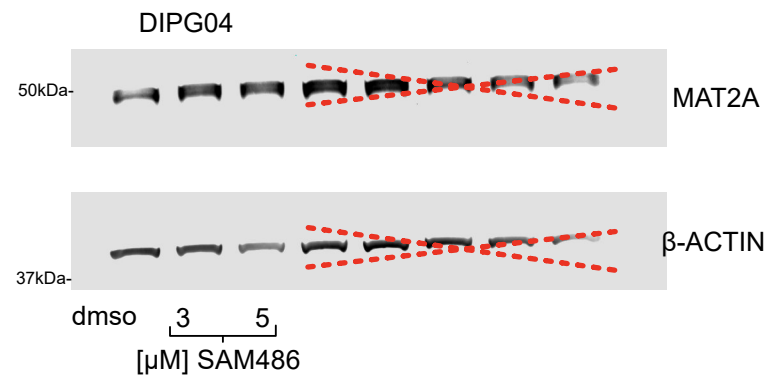

Supplement: 43018_2022_348_MOESM12_ESM.pdf [file 43018_2022_348_MOESM12_ESM.pdf]

Figure 7A

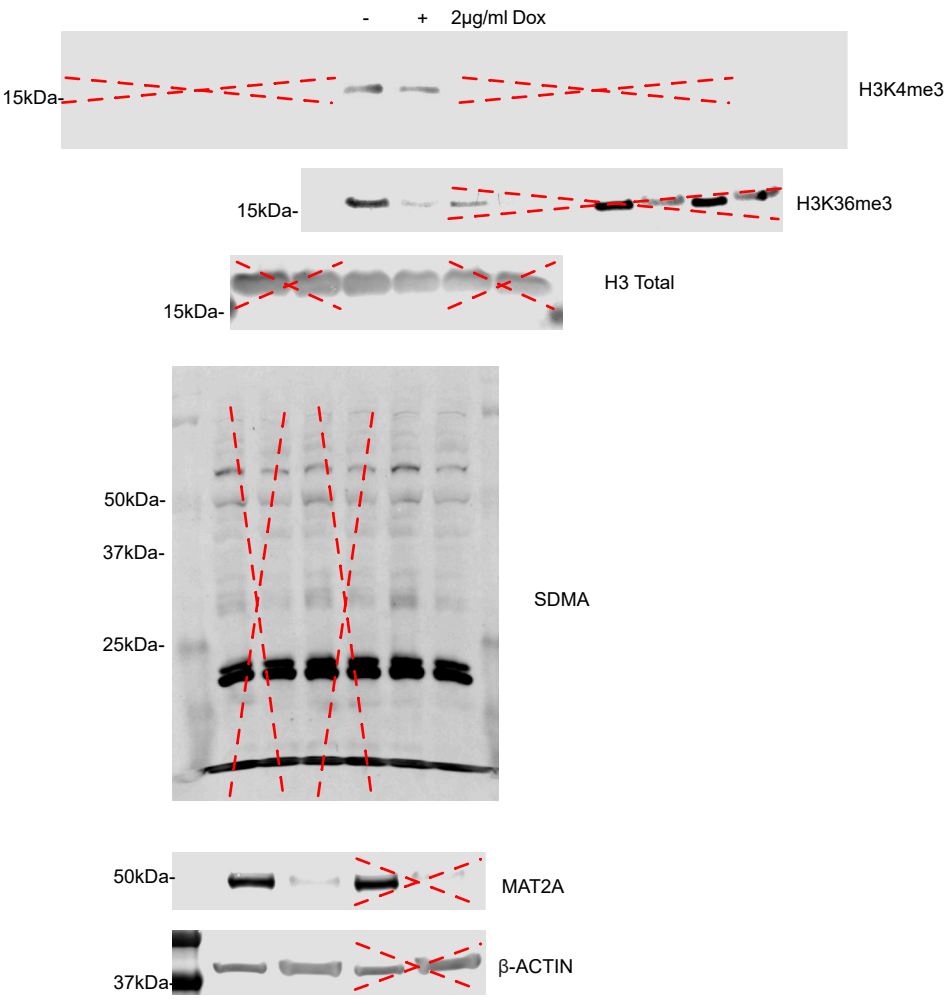

Supplement: 43018_2022_348_MOESM14_ESM.pdf [file 43018_2022_348_MOESM14_ESM.pdf]

Figure 8E

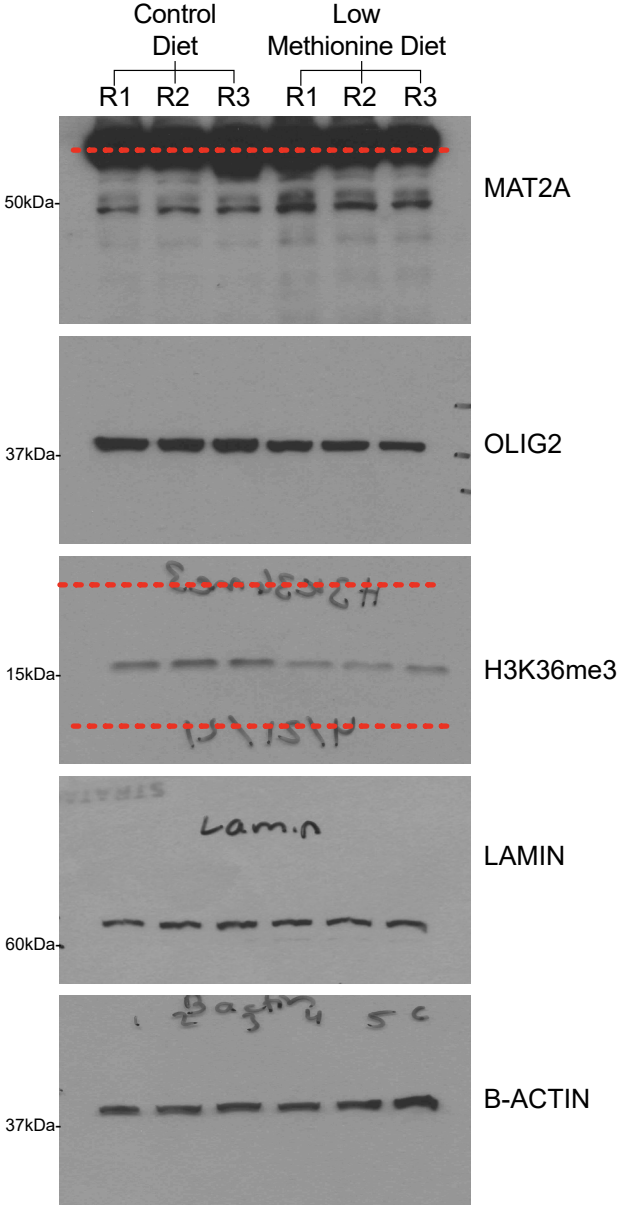

Supplement: 43018_2022_348_MOESM16_ESM.pdf [file 43018_2022_348_MOESM16_ESM.pdf]

# Extended Data Figure 1A

Vector 1 - + - + - +  
 H3 WT - - + + - -  
 H3K27M - - - - ++

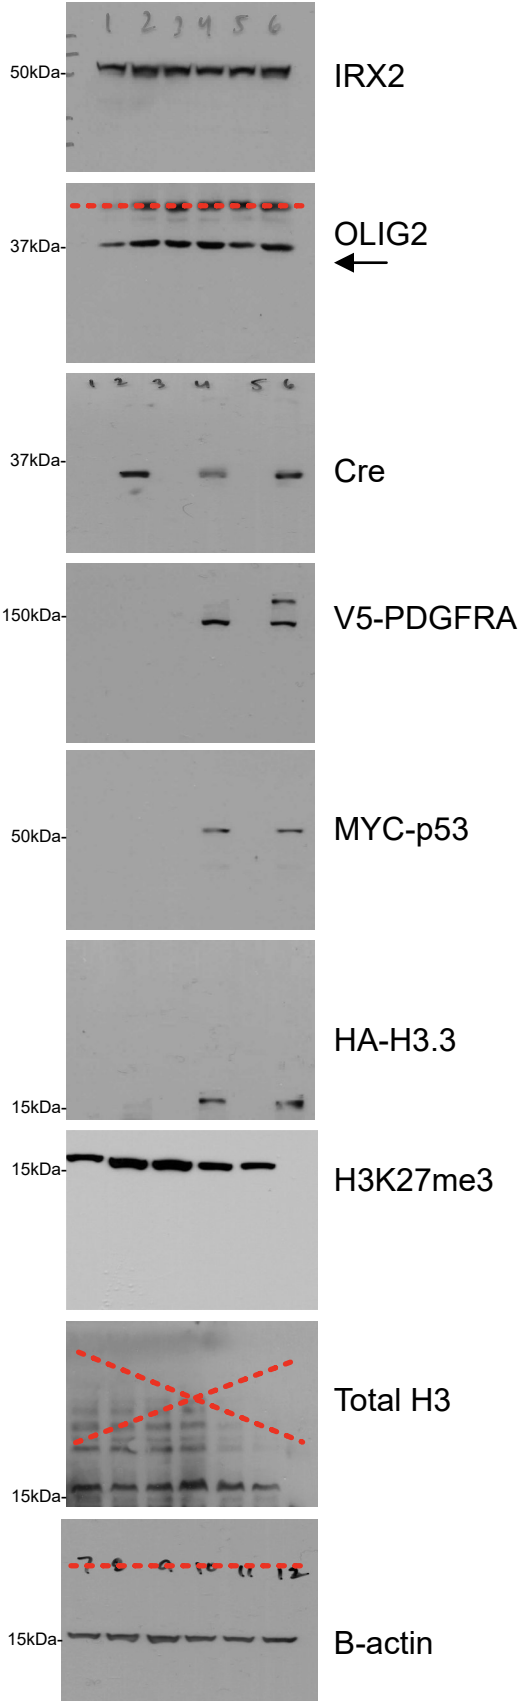

Supplement: 43018_2022_348_MOESM18_ESM.pdf [file 43018_2022_348_MOESM18_ESM.pdf]

# Extended Data Figure 2D

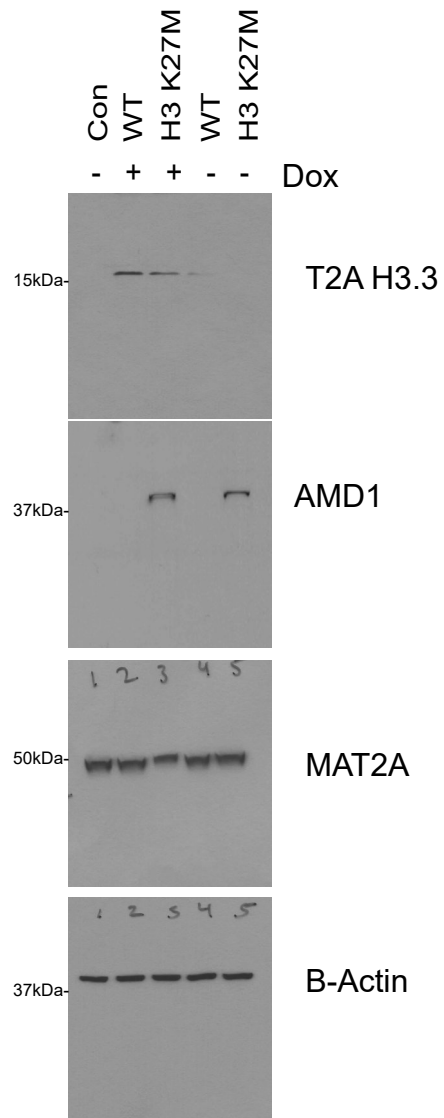

Supplement: 43018_2022_348_MOESM19_ESM.pdf [file 43018_2022_348_MOESM19_ESM.pdf]

# Extended Data Figure 4A

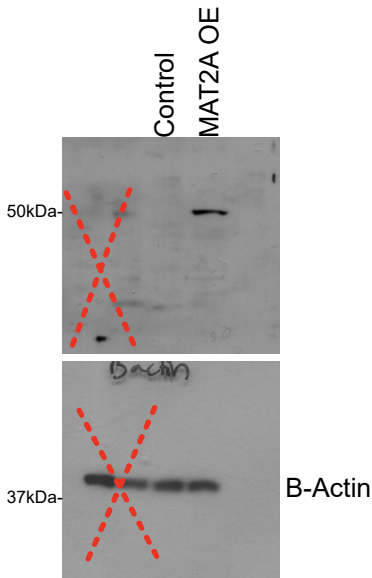

Supplement: 43018_2022_348_MOESM23_ESM.pdf [file 43018_2022_348_MOESM23_ESM.pdf]

Extended DataFigure 5C

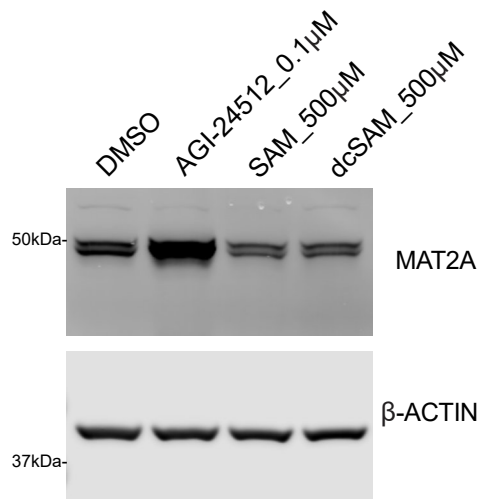

Extended Data Figure 5G

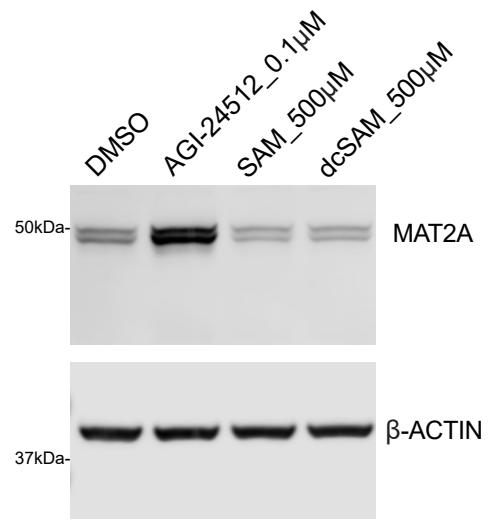

Supplement: 43018_2022_348_MOESM25_ESM.pdf [file 43018_2022_348_MOESM25_ESM.pdf]

# Extended Data Figure 6A

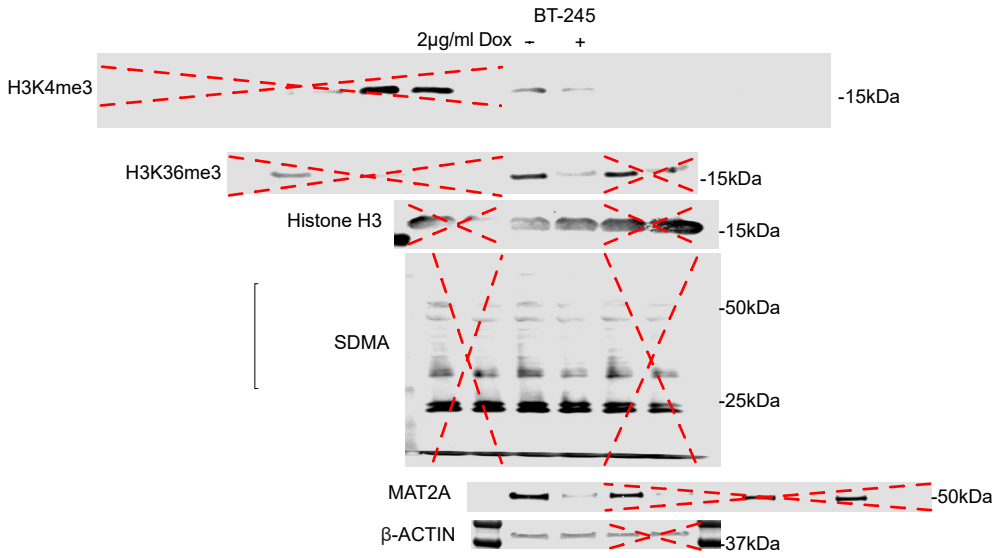

# Extended Data Figure 6C

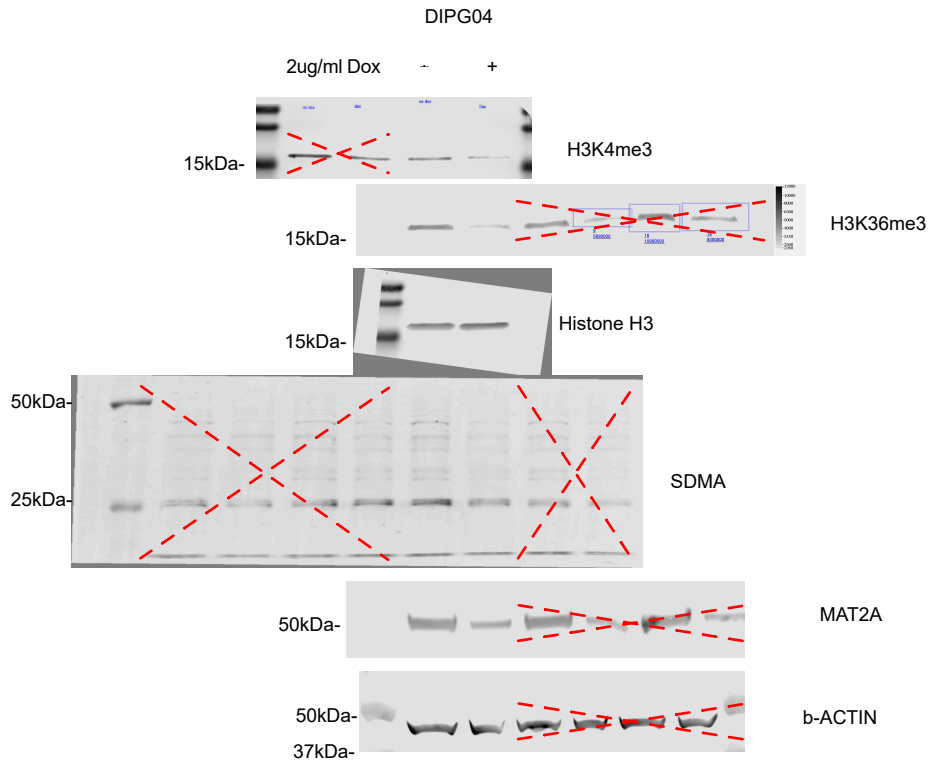

Supplement: 43018_2022_348_MOESM27_ESM.pdf [file 43018_2022_348_MOESM27_ESM.pdf]

# Extended Data Figure 10

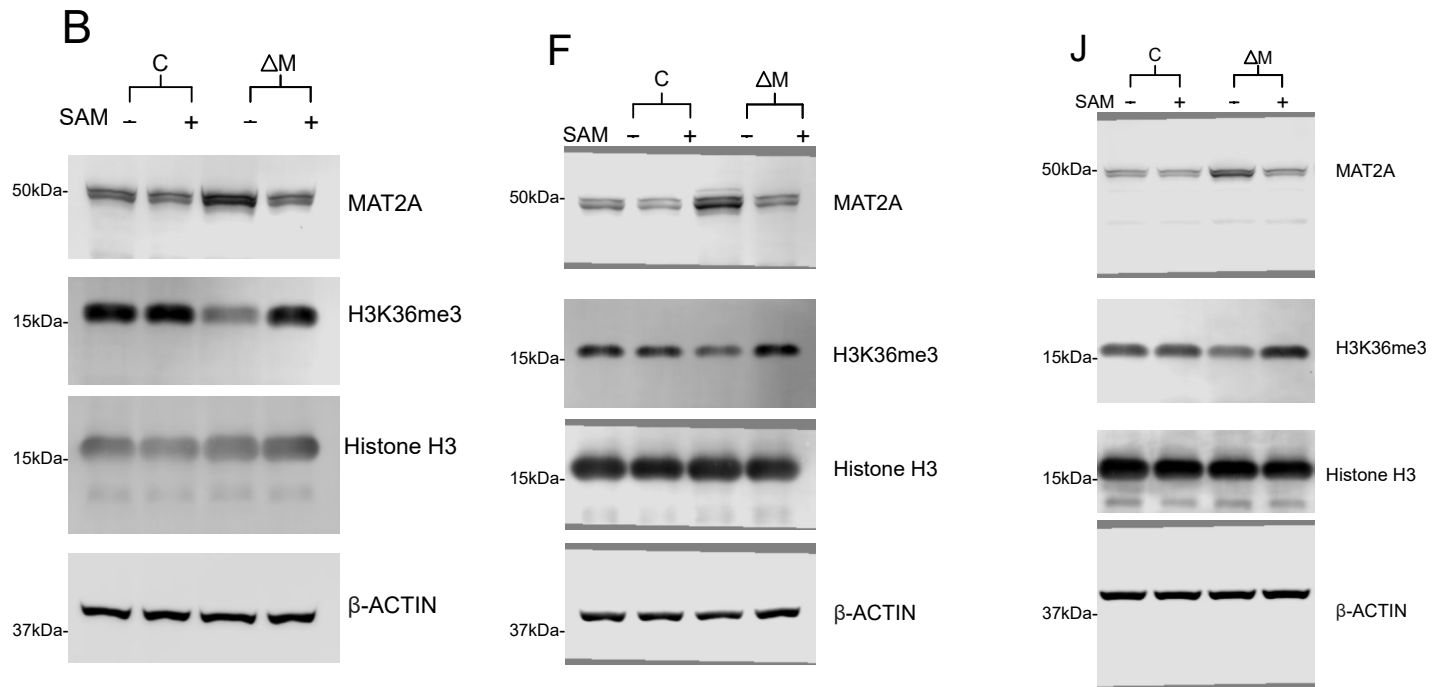

Supplement: 43018_2022_348_MOESM31_ESM.pdf [file 43018_2022_348_MOESM31_ESM.pdf]

Figure 1C

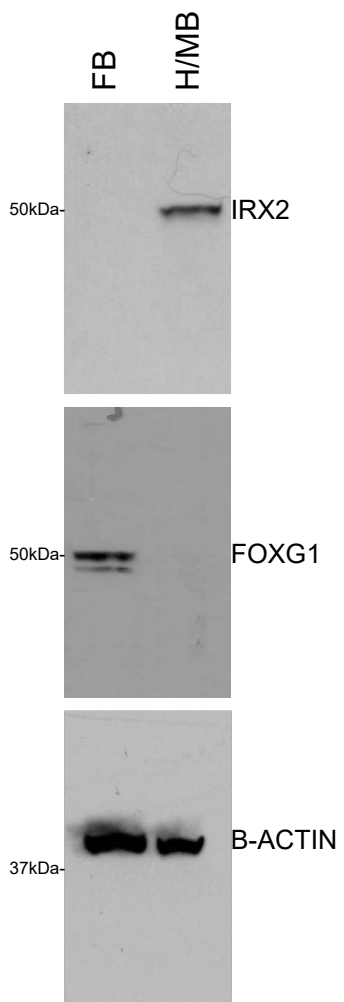

Supplement: 43018_2022_348_MOESM3_ESM.pdf [file 43018_2022_348_MOESM3_ESM.pdf]

Figure 3C

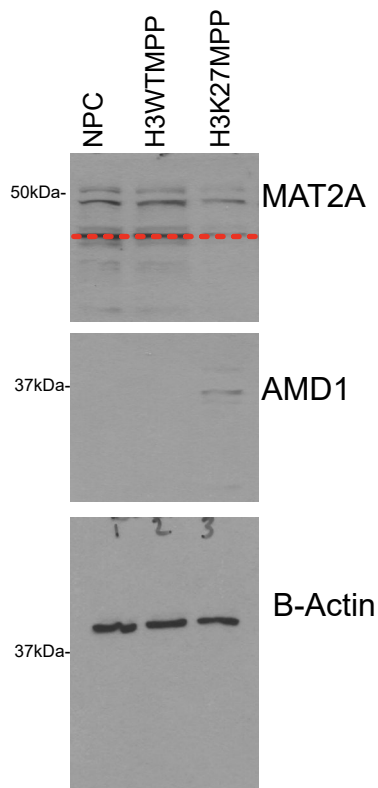

Figure 3D

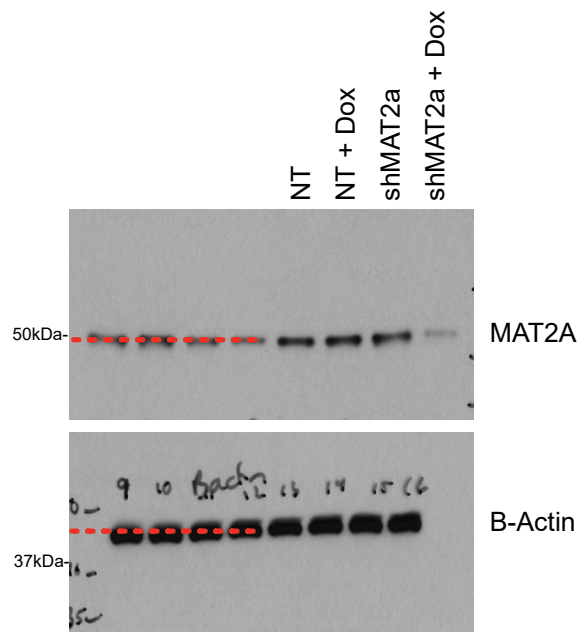

Supplement: 43018_2022_348_MOESM6_ESM.pdf [file 43018_2022_348_MOESM6_ESM.pdf]

Figure 4B

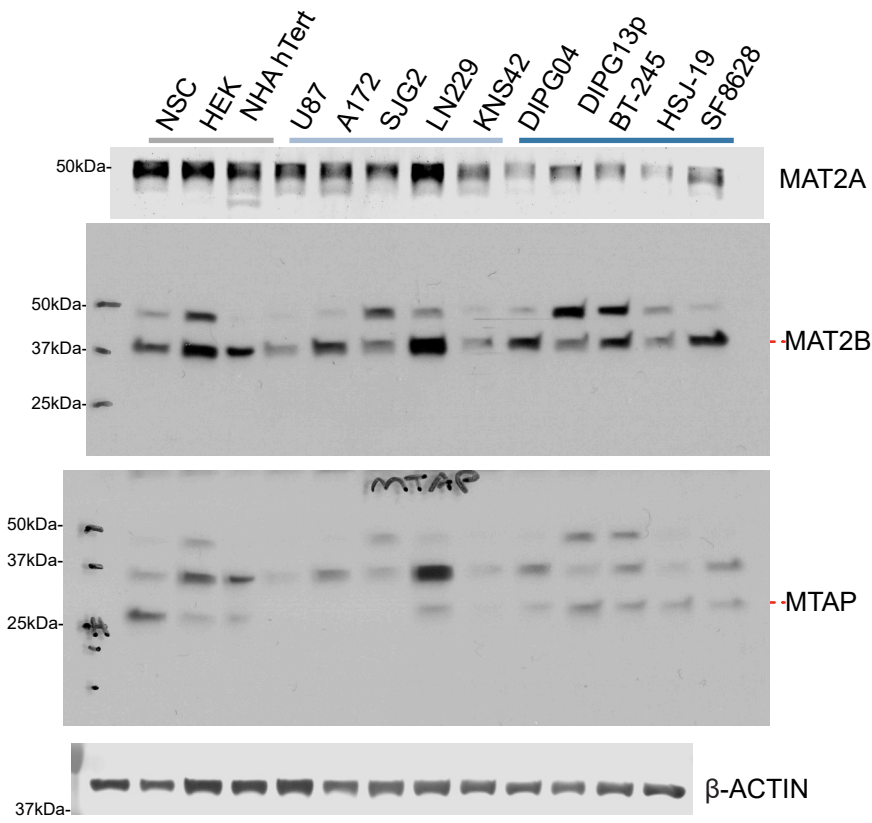

Figure 4J

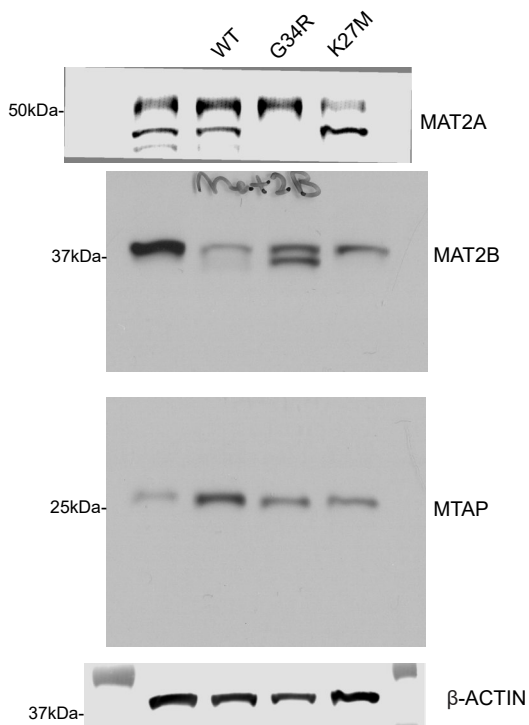

Figure 4L

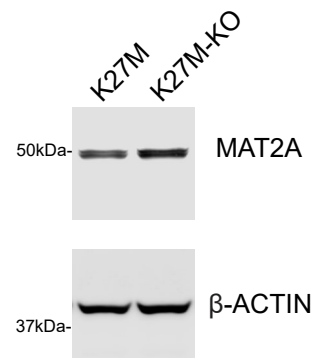

Supplement: 43018_2022_348_MOESM8_ESM.pdf [file 43018_2022_348_MOESM8_ESM.pdf]
